# Supplementary material for: From mononuclear to linear one-dimensional coordination species of copper(ii)–chloranilate: design and characterization
Source: Royal Society of Chemistry journal article supplement (doi:10.1039/c6ra13809h), 2016-01-01
Supplement: c6ra13809h1.pdf [file c6ra13809h1.pdf]

## Electronic supplementary information

### From mononuclear to linear one-dimensional coordination species of copper(II)-chloranilate: design and characterization

Marijana Jurić, Krešimir Molčanov\*, Dijana Žilić and Biserka Kojić-Prodić

*Ruđer Bošković Institute, Bijenička cesta 54, 10000 Zagreb, Croatia.*

**Table S1** Geometric parameters of copper(II) coordination spheres (Å, °) in compounds 1–6. Symmetry operators: *i*)  $-x, -y, 1-z$ ; *ii*)  $-1-x, -y, 1-z$ ; *iii*)  $1+x, y, z$ ; *iv*)  $1-x, y, 1/2-z$ ; *v*)  $x, 1+y, z$ ; *vi*)  $1-x, 1+y, 1/2-z$ ; *vii*)  $-1+x, y, z$ ; *viii*)  $1-x, -y, 1-z$ ; *ix*)  $1-x, y, 1/2-z$ ; *x*)  $1-x, 1+y, 1/2-z$ ; *xi*)  $1/2-x, 3/2-y, -z$ .

| 1                                          |            | 2                       |            | 3                                        |            |
|--------------------------------------------|------------|-------------------------|------------|------------------------------------------|------------|
| Cu1–O1                                     | 1.9999(17) | Cu1–O1                  | 1.9673(17) | Cu1–O1                                   | 1.956(2)   |
| Cu1–O1 <sup>viii</sup>                     | 1.9999(17) | Cu1–O2                  | 1.9652(16) | Cu1–O2                                   | 1.963(2)   |
| Cu1–O2                                     | 1.9444(19) | Cu1–O3                  | 1.9333(17) | Cu1–O3 <sup>vii</sup>                    | 1.953(3)   |
| Cu1–O2 <sup>viii</sup>                     | 1.9444(19) | Cu1–O4                  | 1.9453(18) | Cu1–O4 <sup>vii</sup>                    | 1.955(2)   |
| Cu1–O5                                     | 2.418(2)   | Cu1–O7                  | 2.2799(18) | Cu1–N1                                   | 2.203(4)   |
| O2 <sup>viii</sup> –Cu1–O2                 | 180        | O2–Cu1–O1               | 82.69(7)   | O1–Cu1–O2                                | 83.30(10)  |
| O2 <sup>viii</sup> –Cu1–O1 <sup>viii</sup> | 83.23(7)   | O3–Cu1–O1               | 96.66(7)   | O3 <sup>vii</sup> –Cu1–O1                | 167.57(11) |
| O2 <sup>viii</sup> –Cu1–O1                 | 96.77(7)   | O4–Cu1–O1               | 169.92(7)  | O3 <sup>vii</sup> –Cu1–O2                | 95.63(10)  |
| O2 <sup>viii</sup> –Cu1–O5 <sup>viii</sup> | 91.85(9)   | O1–Cu1–O7               | 91.03(7)   | O4 <sup>vii</sup> –Cu1–O1                | 95.44(10)  |
| O2 <sup>viii</sup> –Cu1–O5                 | 88.15(9)   | O3–Cu1–O2               | 172.01(7)  | O4 <sup>vii</sup> –Cu1–O2                | 169.91(11) |
| O2–Cu1–O1 <sup>viii</sup>                  | 96.77(7)   | O4–Cu1–O2               | 94.62(7)   | O3 <sup>vii</sup> –Cu1–O4 <sup>vii</sup> | 83.44(10)  |
| O2–Cu1–O1                                  | 83.23(7)   | O2–Cu1–O7               | 97.19(7)   | O1–Cu1–N1                                | 99.46(14)  |
| O2–Cu1–O5 <sup>viii</sup>                  | 88.15(9)   | O3–Cu1–O4               | 84.65(7)   | O2–Cu1–N1                                | 95.18(14)  |
| O2–Cu1–O5                                  | 91.85(9)   | O3–Cu1–O7               | 90.78(7)   | O3 <sup>vii</sup> –Cu1–N1                | 92.97(14)  |
| O1 <sup>viii</sup> –Cu1–O1                 | 180        | O4–Cu1–O7               | 98.95(7)   | O4 <sup>vii</sup> –Cu1–N1                | 94.91(14)  |
| O1 <sup>viii</sup> –Cu1–O5 <sup>viii</sup> | 89.51(8)   |                         |            |                                          |            |
| O1 <sup>viii</sup> –Cu1–O5                 | 90.49(8)   |                         |            |                                          |            |
| O1–Cu1–O5 <sup>viii</sup>                  | 90.49(8)   |                         |            |                                          |            |
| O1–Cu1–O5                                  | 89.51(8)   |                         |            |                                          |            |
| O5 <sup>viii</sup> –Cu1–O5                 | 180        |                         |            |                                          |            |
| 4                                          |            | 5                       |            |                                          |            |
| Cu1–O1                                     | 2.281(5)   | Cu1–O1                  | 1.978(2)   |                                          |            |
| Cu1–O1 <sup>i</sup>                        | 2.281(5)   | Cu1–O1 <sup>iv</sup>    | 1.978(2)   |                                          |            |
| Cu1–O2 <sup>ii</sup>                       | 2.048(5)   | Cu1–O2 <sup>v</sup>     | 1.979(2)   |                                          |            |
| Cu1–O2 <sup>iii</sup>                      | 2.048(5)   | Cu1–O2 <sup>vi</sup>    | 1.979(2)   |                                          |            |
| Cu1–O3                                     | 2.024(7)   | Cu1–O3                  | 2.314(4)   |                                          |            |
| Cu1–O3 <sup>i</sup>                        | 2.024(7)   | Cu1–O3 <sup>iv</sup>    | 2.314(4)   |                                          |            |
| O3–Cu1–O3 <sup>i</sup>                     | 179.9(4)   | O1–Cu1–O1 <sup>iv</sup> | 82.85(9)   |                                          |            |
| O3–Cu1–O2 <sup>ii</sup>                    | 90.0(3)    | O1–Cu1–O2 <sup>v</sup>  | 97.24(9)   |                                          |            |
| O3–Cu1–O2 <sup>iii</sup>                   | 90.0(3)    | O1–Cu1–O2 <sup>vi</sup> | 179.36(11) |                                          |            |
| O3–Cu1–O1                                  | 88.7(2)    | O1–Cu1–O3               | 89.97(12)  |                                          |            |

|                                         |          |                                        |            |
|-----------------------------------------|----------|----------------------------------------|------------|
| O3–Cu1–O1 <sup>i</sup>                  | 91.3(2)  | O1–Cu1–O3 <sup>iv</sup>                | 90.22(12)  |
| O3 <sup>i</sup> –Cu1–O2 <sup>ii</sup>   | 90.0(3)  | O1 <sup>iv</sup> –Cu1–O2 <sup>v</sup>  | 179.36(11) |
| O3 <sup>i</sup> –Cu1–O2 <sup>iii</sup>  | 90.0(3)  | O1 <sup>iv</sup> –Cu1–O2 <sup>vi</sup> | 97.24(9)   |
| O3 <sup>i</sup> –Cu1–O1                 | 91.3(2)  | O1 <sup>iv</sup> –Cu1–O3               | 90.22(12)  |
| O3 <sup>i</sup> –Cu1–O1 <sup>i</sup>    | 88.7(2)  | O1 <sup>iv</sup> –Cu1–O3 <sup>iv</sup> | 89.97(12)  |
| O2 <sup>ii</sup> –Cu1–O2 <sup>iii</sup> | 180.0(3) | O2 <sup>v</sup> –Cu1–O2 <sup>vi</sup>  |            |
| O2 <sup>ii</sup> –Cu1–O1                | 75.8(2)  | O2 <sup>v</sup> –Cu1–O3                | 89.15(12)  |
| O2 <sup>ii</sup> –Cu1–O1 <sup>i</sup>   | 104.2(2) | O2 <sup>v</sup> –Cu1–O3 <sup>iv</sup>  | 90.67(12)  |
| O2 <sup>iii</sup> –Cu1–O1               | 104.2(2) | O2 <sup>vi</sup> –Cu1–O3               | 90.67(12)  |
| O2 <sup>iii</sup> –Cu1–O1 <sup>i</sup>  | 75.8(2)  | O2 <sup>vi</sup> –Cu1–O3 <sup>iv</sup> | 89.15(12)  |
| O1–Cu1–O1 <sup>i</sup>                  | 180.0(2) | O3–Cu1–O3 <sup>iv</sup>                | 179.76(14) |

| <b>6a</b>                                 |            | <b>6b</b>                                 |            |
|-------------------------------------------|------------|-------------------------------------------|------------|
| Cu1a–O1a                                  | 2.1654(14) | Cu1b–O1b                                  | 2.0469(13) |
| Cu1a–O1a <sup>ix</sup>                    | 2.1654(14) | Cu1b–O1b <sup>xi</sup>                    | 2.0469(13) |
| Cu1a–O2a <sup>v</sup>                     | 2.1703(14) | Cu1b–O2b                                  | 2.2995(13) |
| Cu1a–O2a <sup>x</sup>                     | 2.1703(14) | Cu1b–O2b <sup>xi</sup>                    | 2.2995(13) |
| Cu1a–N1a                                  | 2.000(2)   | Cu1b–N1b                                  | 2.004(2)   |
| Cu1a–N1a <sup>xi</sup>                    | 2.000(2)   | Cu1b–N1b <sup>ix</sup>                    | 2.004(2)   |
| N1a <sup>ix</sup> –Cu1a–N1a               | 177.70(7)  | N1b–Cu1b–N1b <sup>xi</sup>                | 180        |
| N1a <sup>ix</sup> –Cu1a–O1a               | 89.17(7)   | N1b–Cu1b–O1b                              | 88.51(6)   |
| N1a <sup>ix</sup> –Cu1a–O1a <sup>ix</sup> | 92.65(7)   | N1b–Cu1b–O1b <sup>xi</sup>                | 91.49(6)   |
| N1a <sup>ix</sup> –Cu1a–O2a <sup>v</sup>  | 86.58(7)   | N1b–Cu1b–O2b <sup>xi</sup>                | 87.09(6)   |
| N1a <sup>ix</sup> –Cu1a–O2a <sup>x</sup>  | 91.59(7)   | N1b–Cu1b–O2b                              | 92.91(6)   |
| N1a–Cu1a–O1a                              | 92.65(7)   | N1b <sup>xi</sup> –Cu1b–O1b               | 91.49(6)   |
| N1a–Cu1a–O1a <sup>ix</sup>                | 89.17(7)   | N1b <sup>xi</sup> –Cu1b–O1b <sup>xi</sup> | 88.51(6)   |
| N1a–Cu1a–O2a <sup>v</sup>                 | 91.59(7)   | N1b <sup>xi</sup> –Cu1b–O2b <sup>xi</sup> | 92.91(6)   |
| N1a–Cu1a–O2a <sup>x</sup>                 | 86.58(7)   | N1b <sup>xi</sup> –Cu1b–O2b               | 87.09(6)   |
| O1a–Cu1a–O1a <sup>ix</sup>                | 75.84(6)   | O1b–Cu1b–O1b <sup>xi</sup>                | 180        |
| O1a–Cu1a–O2a <sup>v</sup>                 | 104.48(5)  | O1b–Cu1b–O2b <sup>x</sup>                 | 104.82(5)  |
| O1a–Cu1a–O2a <sup>x</sup>                 | 179.16(6)  | O1b–Cu1b–O2b                              | 75.18(5)   |
| O1a <sup>ix</sup> –Cu1a–O2a <sup>v</sup>  | 179.16(6)  | O1b <sup>xi</sup> –Cu1b–O2b <sup>xi</sup> | 75.18(5)   |
| O1a <sup>ix</sup> –Cu1a–O2a <sup>x</sup>  | 104.48(5)  | O1b <sup>xi</sup> –Cu1b–O2b               | 104.82(5)  |
| O2a <sup>v</sup> –Cu1a–O2a <sup>x</sup>   | 75.22(6)   | O2b <sup>xi</sup> –Cu1b–O2b               | 180        |

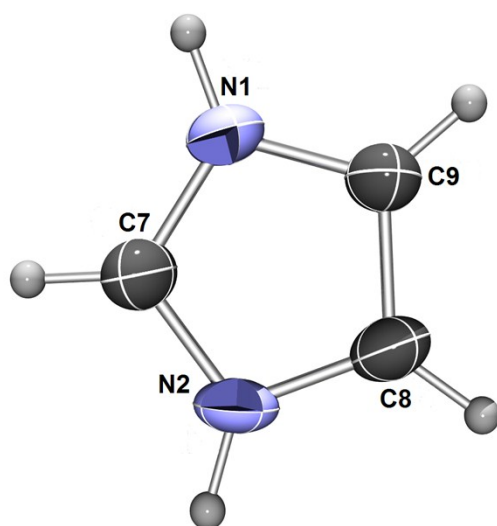

**Fig. S1** ORTEP-3 drawing of the imidazolium cation in **1**. Displacement ellipsoids are drawn at the probability of 50% and hydrogen atoms are shown as spheres of arbitrary radii.

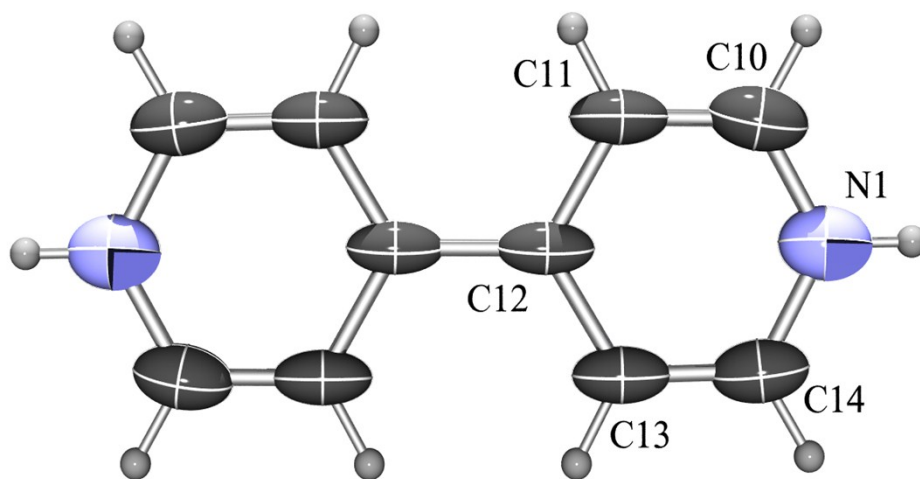

**Fig. S2** ORTEP-3 drawing of the 4,4'-bipyridinium cation in **2**. Displacement ellipsoids are drawn at the probability of 50% and hydrogen atoms are shown as spheres of arbitrary radii.
